# Supplementary material for: Turntable Paper-Based Device to Detect Escherichia coli
Source: MDPI journal article supplement (doi:10.3390/mi12020194), 2021-02-13
Supplement: s1 [file s1]

# Supplementary Materials: Turntable paper-based device to detect *Escherichia coli*

Yung-Chih Wang <sup>1</sup>, Yao-Hung Tsai <sup>2</sup>, Ching-Fen Shen <sup>3</sup>, Ming-Yao He <sup>2</sup>, Yi-Chen Fu <sup>2</sup>, Chen-Yu Sang <sup>2</sup>, Yi-Tzu Lee <sup>4,5,\*</sup> and Chao-Min Cheng <sup>2,\*</sup>

<sup>1</sup> Division of Infectious Diseases and Tropical Medicine, Department of Internal Medicine, Tri-Service General Hospital, National Defense Medical Center, Taipei, 114, Taiwan; wystwyst@gmail.com

<sup>2</sup> Institute of Biomedical Engineering, National Tsing Hua University, Hsinchu, 300, Taiwan; michaeltsai45@gmail.com (Y.-H.T.); martin880210@gmail.com (M.-Y.H.); sandy216621@gmail.com (Y.-C.F.); sang0205@gmail.com (C.-Y.S.)

<sup>3</sup> Department of Pediatrics, National Cheng Kung University Hospital, College of Medicine, National Cheng Kung University, Tainan, 701, Taiwan; drshen1112@gmail.com

<sup>4</sup> Department of Emergency Medicine, Taipei Veterans General Hospital, Taipei, 112, Taiwan

<sup>5</sup> Faculty of Medicine, School of Medicine, National Yang-Ming University, Taipei, 112, Taiwan

\* Correspondence: chaomin@mx.nthu.edu.tw (C.-M.C.); s851009@yahoo.com.tw (Y.-T. L.)

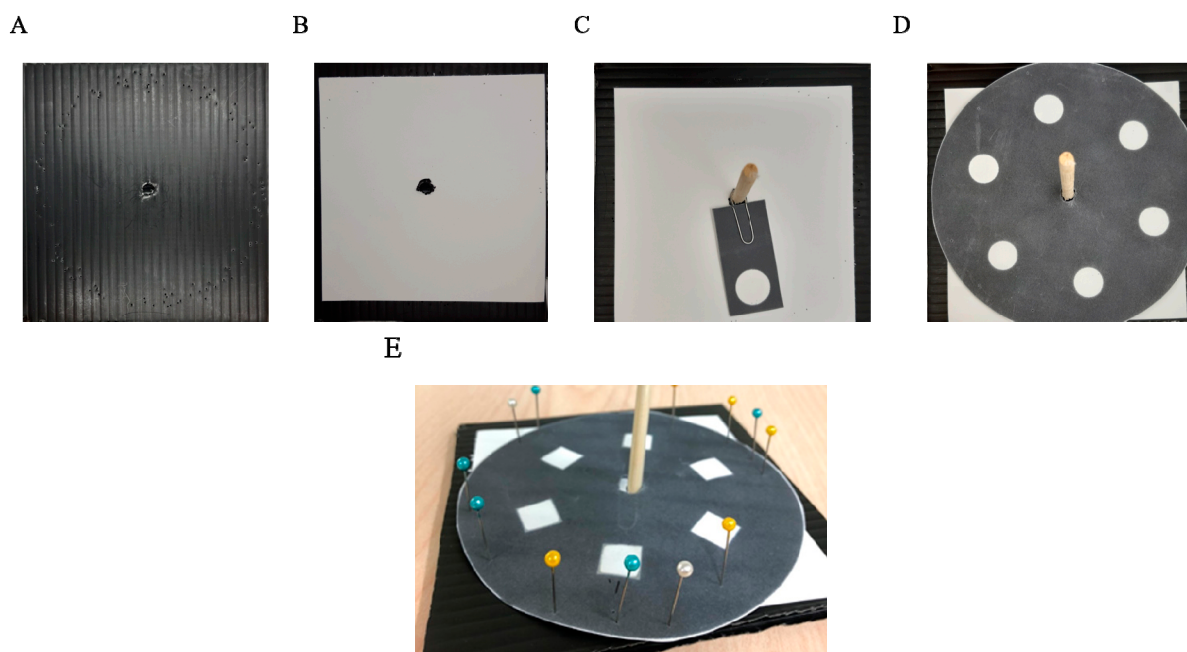

**Figure S1.** Structure of turntable device. (A) An acrylic board drilled with a hole in the middle is the base of the whole device. (B) Blotting paper was placed in the first layer and was also drilled with a hole in the middle. (C) A chopstick which glued to a pin was stuck into the hole in the middle as the rotation axis, and the second layer filter paper was fixed to the axis by the pin. (D) The third layer filter paper was cut into circle shape and was penetrated by the axis in the middle. (E) After confirmed that the rotation of second layer is fine, fixed the third layer with base and the first layer by tacks.
